# Supplementary figures and images for: Generation of a Porcine Cell Line Stably Expressing Pig TMPRSS2 for Efficient Isolation of Swine Influenza Virus
Source: MDPI journal article supplement (doi:10.3390/pathogens13010018), 2023-12-24

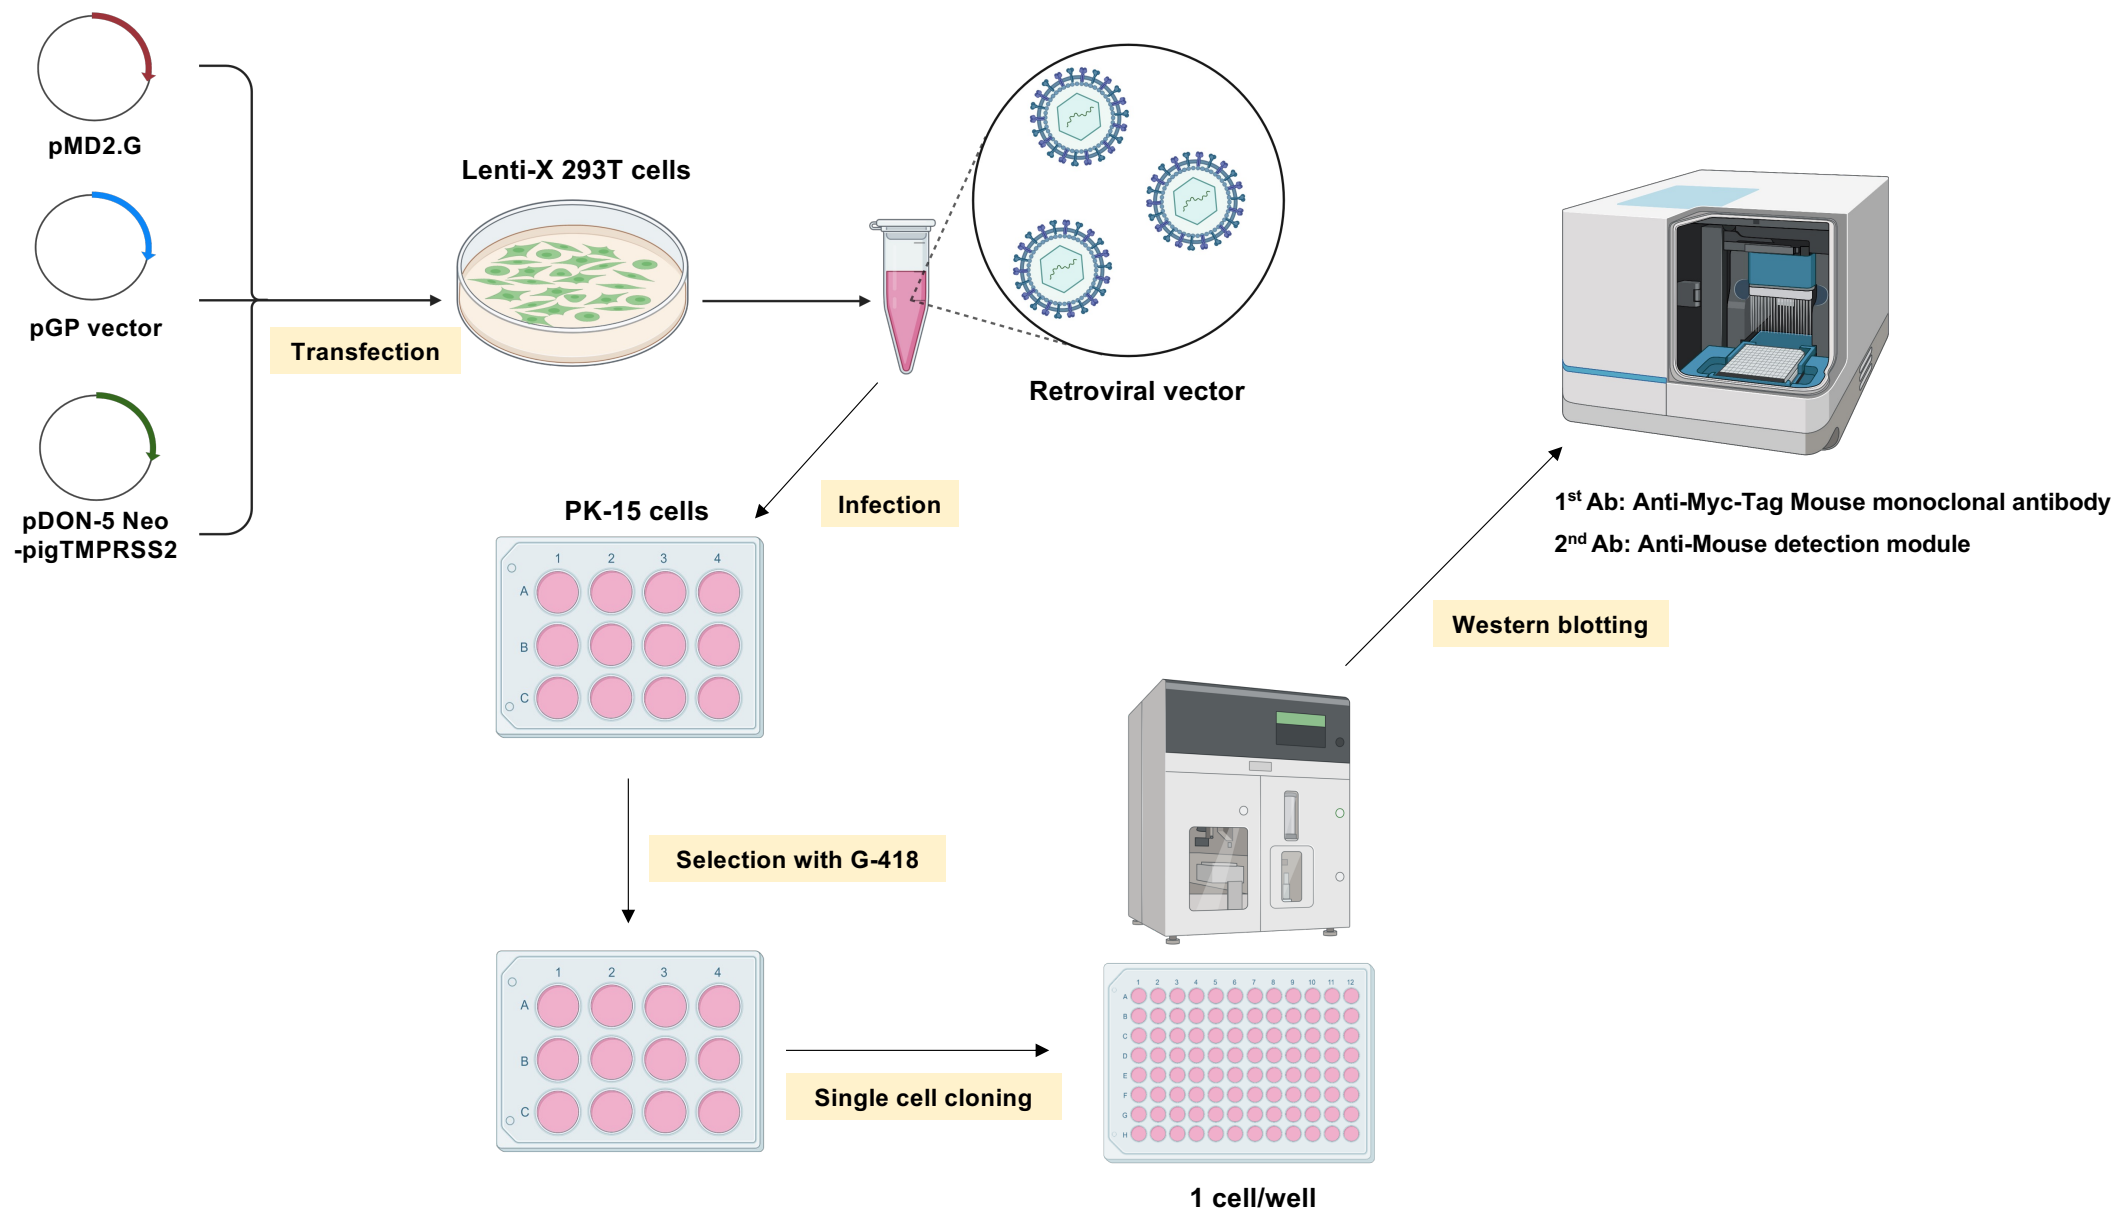

Supplement: s1 [file s1]
